# Supplementary material for: Matrix rigidity regulates a switch between TGF-β1–induced apoptosis and epithelial–mesenchymal transition
Source: PubMed Central journal article supplement — Mol Biol Cell. 2012 Mar 1;23(5):781–91. doi: 10.1091/mbc.E11-06-0537 (PMC3290638; doi:10.1091/mbc.e11-06-0537), 2012-03-01
Supplement: supp_E11-06-0537_CombinedSupMats.pdf [file supp_E11-06-0537_CombinedSupMats.pdf]

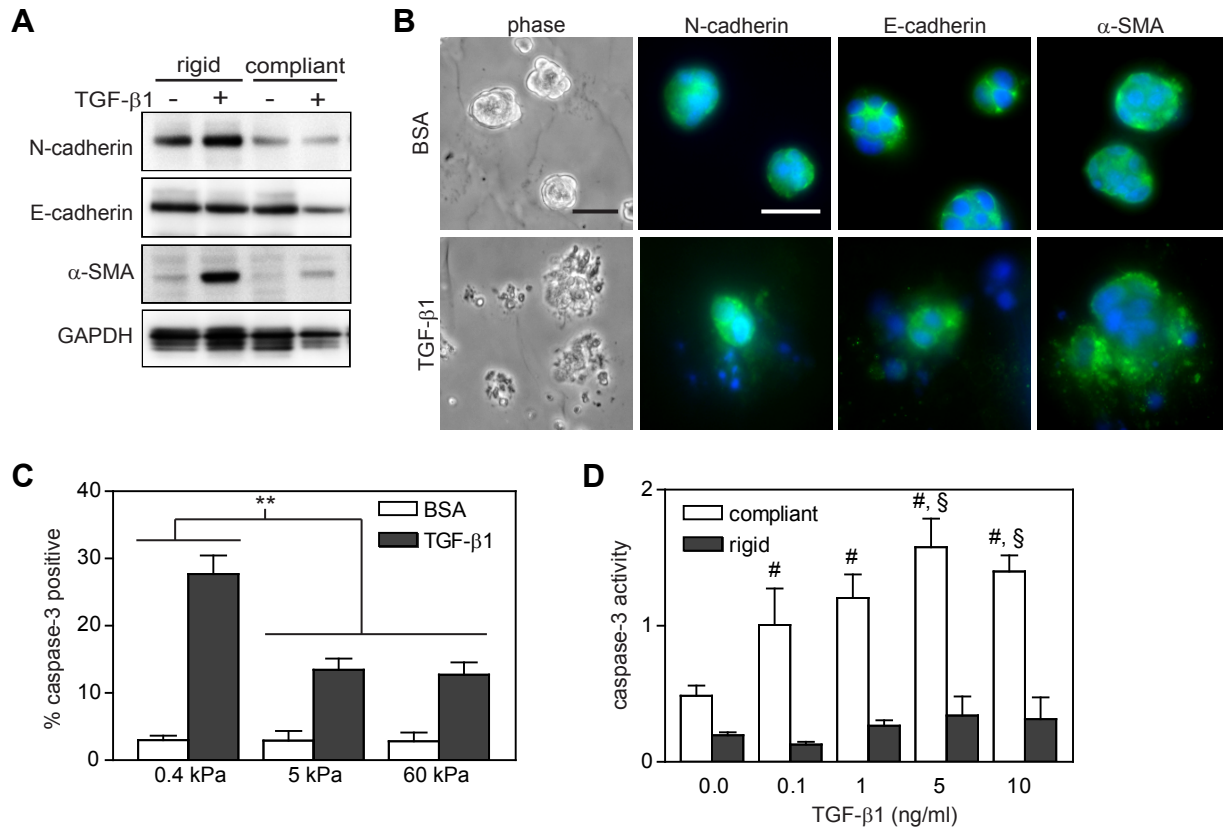

Supplemental Figure 1. TGF- $\beta$ 1 induced apoptosis and EMT in NMuMG cells cultured on polyacrylamide gels. (A) Western blot of N-cadherin, E-cadherin,  $\alpha$ -SMA, and GAPDH control in cells cultured on rigid (8 kPa) PA gels and compliant gels (0.4 kPa) treated with TGF- $\beta$ 1 or BSA control. (B) Phase contrast and immunofluorescence images of cells cultured on compliant PA gels. (C) Graph of percentage of cells positive for cleaved-caspase-3 immunofluorescence. (D) Caspase-3 activity in cells treated with 0.1 to 10 ng/ml TGF- $\beta$ 1. n=3 + SEM. \*\*, p < 0.01; #, p < 0.01, compliant condition as compared to rigid condition; §, p < 0.05 as compared to compliant 0 ng/ml TGF- $\beta$ 1 condition. Bars, 50  $\mu$ m.

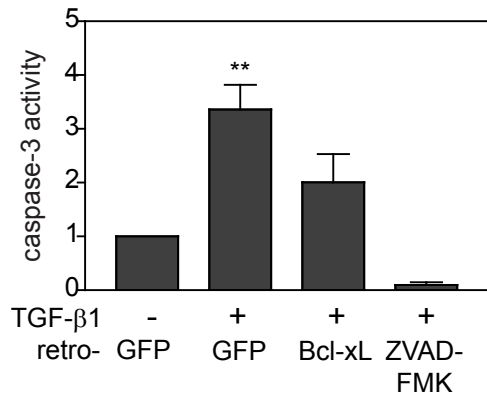

Supplemental Figure 2. Caspase-3 activity in NMuMG cells infected with retro-GFP, retro-Bcl-xL, or treated with 400  $\mu$ M ZVAD-FMK prior to treatment with TGF- $\beta$ 1. n=3+SEM \*\*, P<0.01.

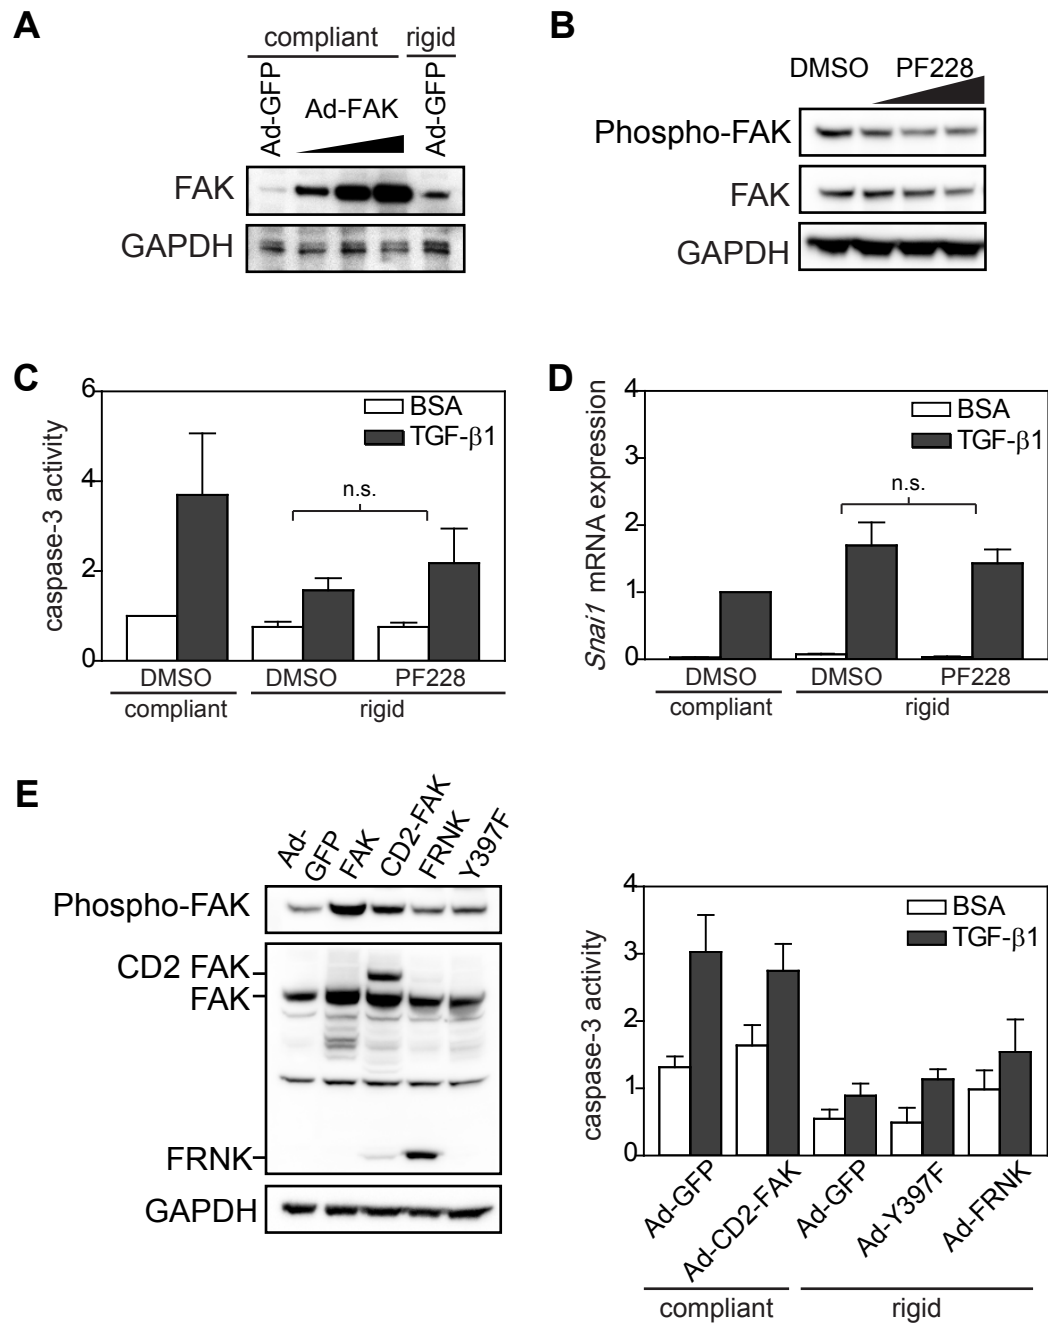

Supplemental Figure 3. Manipulation of FAK activity does not affect EMT or apoptosis in NMuMG cells. (A) Western blot of FAK and GAPDH in cells infected with Ad-GFP or Ad-FAK. Graph of caspase-3 activity (C) and *Snai1* mRNA (D) in cells treated with PF 573228 (B). (E) Caspase-3 activity in cells infected with Ad-GFP, Ad-FAK, Ad-CD2 FAK, Ad-FRNK, and Ad-Y397F FAK. n=3+SEM

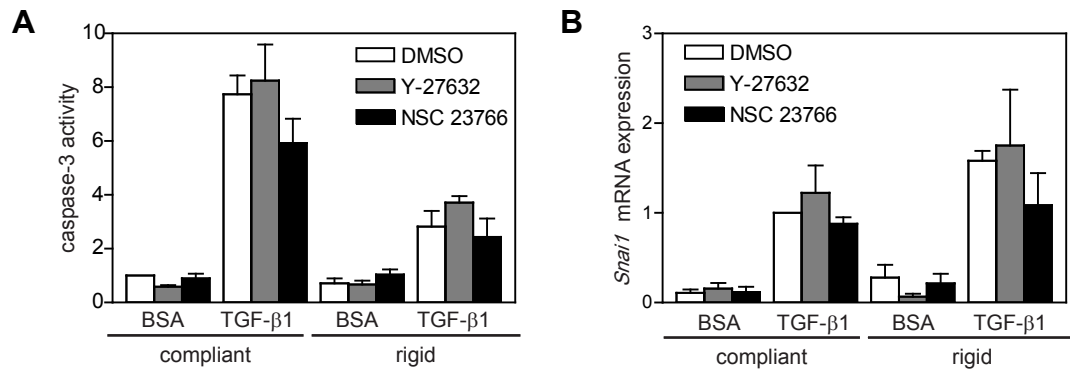

Supplemental Figure 4. Effect of inhibition of ROCK and Rac on apoptosis and EMT in NMuMG cells. (A) Caspase-3 activity and (B) *Snai1* mRNA expression in cells treated with 10  $\mu$ m Y-27632, NSC 23766, or DMSO control. n=3+SEM.
